# Supplementary material for: Improved chemical stability of silver by selective distribution of silver particles on reduced graphene oxide nanosheets
Source: Royal Society of Chemistry journal article supplement (doi:10.1039/c5ra04508h), 2015-01-01
Supplement: c5ra04508h1.pdf [file c5ra04508h1.pdf]

Supporting Information

Improved chemical stability of silver by selective distribution of silver particles on reduced graphene oxide nanosheets

Xiu-Zhi Tang<sup>a</sup>, Xuelong Chen<sup>b</sup>, Gang Wu<sup>a</sup>, Xiao Hu<sup>b\*</sup>, Jinglei Yang<sup>a\*</sup>

<sup>a</sup>School of Mechanical and Aerospace Engineering, Nanyang Technological University, 50 Nanyang Avenue, Singapore 639798

<sup>b</sup>School of Materials Science and Engineering, Nanyang Technological University, 50 Nanyang Avenue, Singapore, 639798

---

\* Corresponding Authors. Tel: +65 6790 6906. E-mails: [mjlyang@ntu.edu.sg](mailto:mjlyang@ntu.edu.sg) ( Jinglei Yang); [asxhu@ntu.edu.sg](mailto:asxhu@ntu.edu.sg) (Xiao Hu)

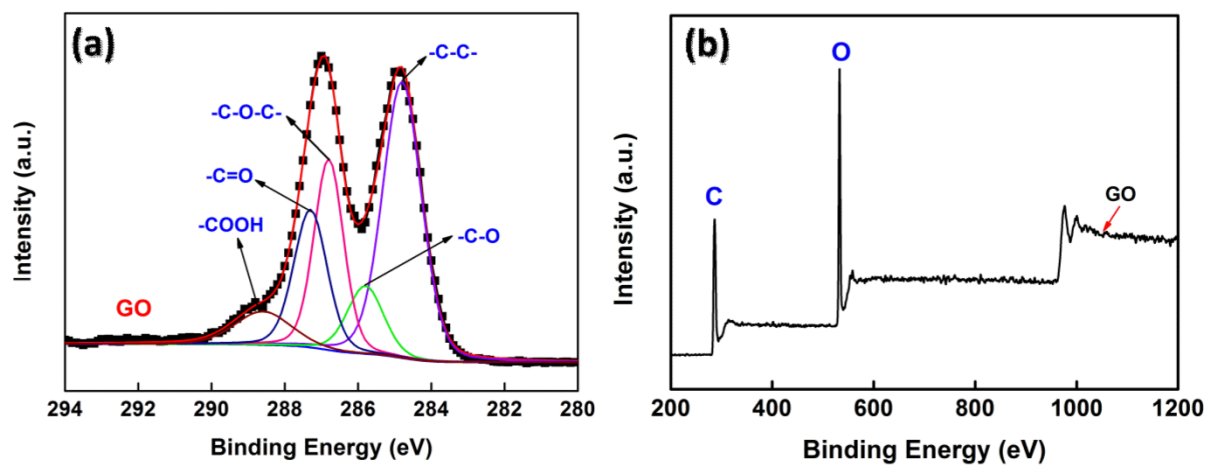

Fig. S1. (a) C 1s spectra of GO, (b) Wide-scan XPS spectrum of graphene oxide.

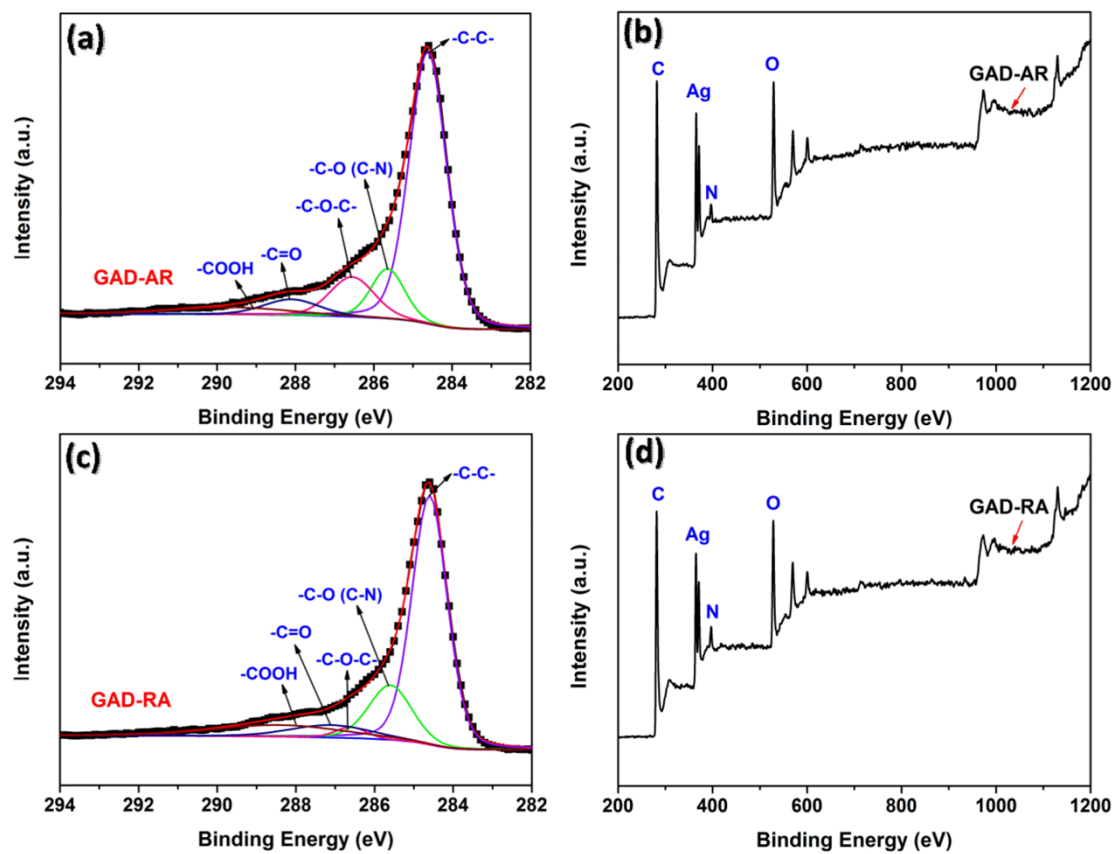

Fig. S2. (a) Deconvoluted high resolution XPS spectra of GAD-AR, (b) Wide-scan spectrum of GAD-AR, (c) Deconvoluted high resolution XPS spectra of GAD-RA, (d) Wide-scan spectrum of GAD-RA.

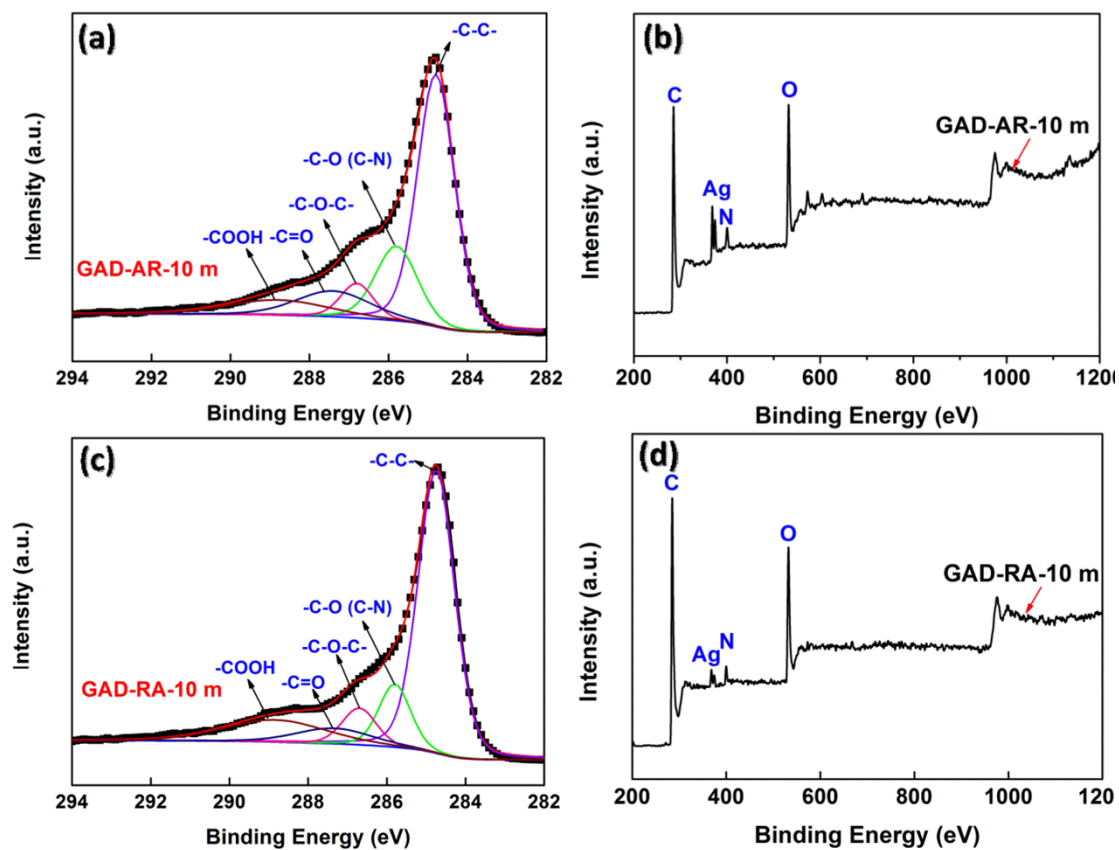

Fig. S3. (a) Deconvoluted high resolution XPS spectra of GAD-AR-10 m, (b) Wide-scan spectrum of GAD-AR-10 m, (c) Deconvoluted high resolution XPS spectra of GAD-RA-10 m, (d) Wide-scan spectrum of GAD-RA-10 m.
